# Supplementary material for: Antimicrobial Properties of a Peptide Derived from the Male Fertility Factor kl2 Protein of Drosophila melanogaster
Source: MDPI journal article supplement (doi:10.3390/cimb44030076), 2022-02-28
Supplement: s1 [file s1]

## Supporting information:

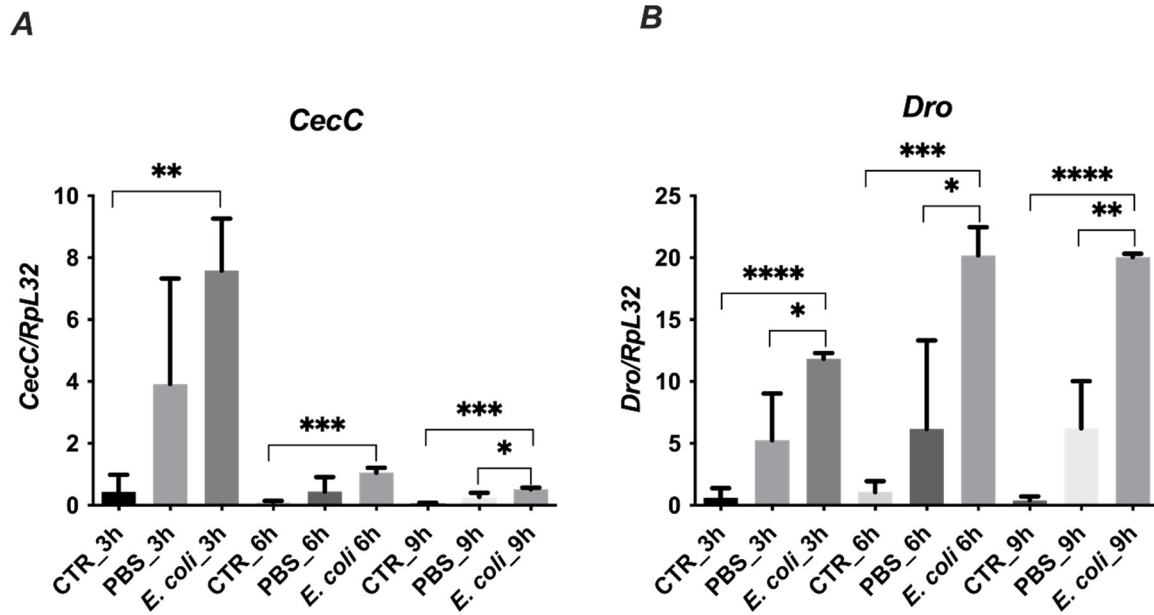

**Figure S1.** Up-regulation of AMPs- encoding genes ((A) – Cecropin C ; (B) – Drosocin) after infection – control. Canton S flies were infected with *E. coli*, 3 h, 6 h and 9 h after infection flies were collected and total RNA was subjected to RT-qPCR. Relative expression of indicated genes are shown as a mean  $\pm$  SD (n = 3 independent experiments, with 15 flies in each). Statistically significant differences between groups are indicated as \*\*\*\*  $p < 0.0001$ ; \*\*\*  $p < 0.001$ ; \*\*  $p < 0.01$ ; \*  $p < 0.05$  by two tailed Students *t*-test.
